# Supplementary material
Source: PubMed Central journal article supplement (PMC2964153)
Supplement: NIHMS241102-supplement-supplement_1.pdf [file NIHMS241102-supplement-supplement_1.pdf]

SUPPLEMENTARY INFORMATION

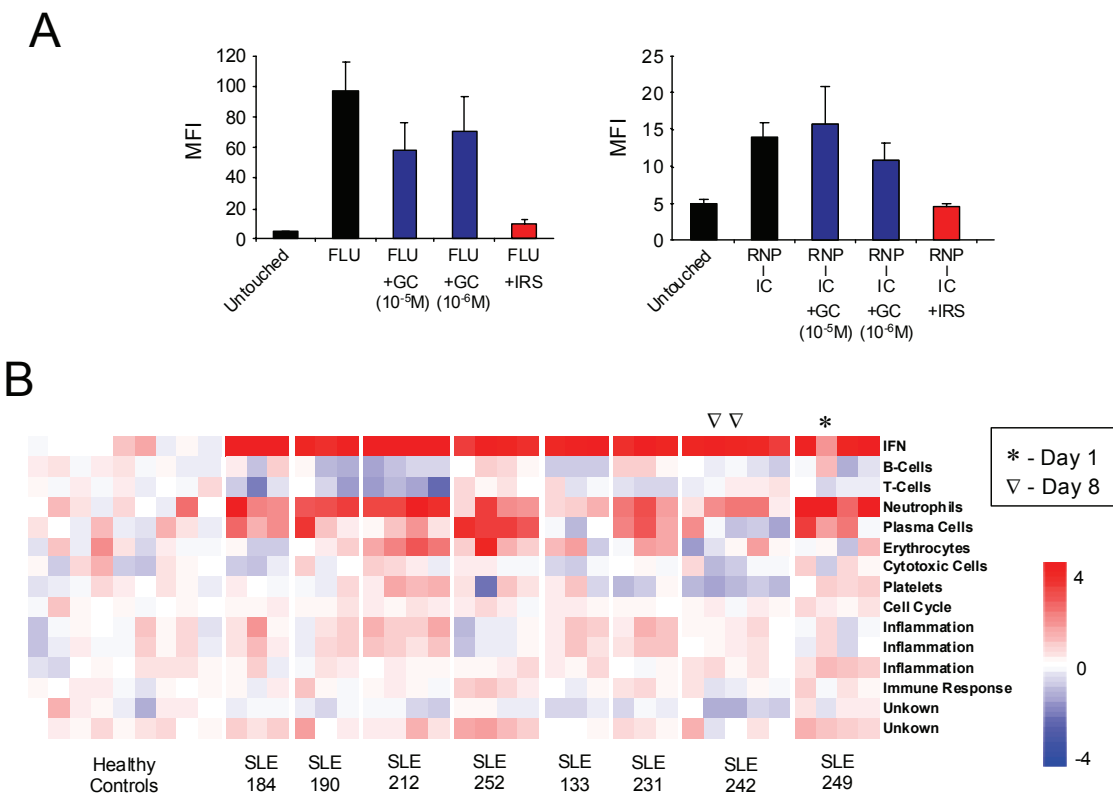

**Supplementary Figure 1: Transient levels of the PDC-induced IFN signature in GC-treated SLE patients.**

(A) Purified human PDC were cultured alone or in the presence of Flu (2 MOI) or purified anti-RNP IC isolated from SLE patients either alone or combined with GC (10<sup>-5</sup>M or 10<sup>-6</sup>M or IRS (0.5 μM). After 3 hr, cells were assayed for IFN-α secretion and cumulative data of five donors shown as MFI (mean ± standard error of the mean). (B) Nanostring nCounter system was used to assess the longitudinal blood gene expression levels in healthy donors and SLE patients. Probes corresponding to 12 IFN-inducible genes were included in Nanostring codeset (see supplemental table 1). Gene expression levels were normalized to control genes and to healthy donors. Heatmap (log 2 scale) corresponding to 8 SLE patient longitudinal samples (individual columns) is shown. Samples corresponding to patients SLE184, 190, 212, 252, 133 and 231 were obtained at 2-3 month intervals. These patients were receiving oral GC but no IV Methylprednisolone pulses. SLE 242 was analyzed the day before an IV pulse, 8 days after 2 independent IV pulses (marked as ∇), and 2 additional times while on oral GC. SLE 249 was analyzed the day before and the day after an IV pulse (marked as \*), and two additional times while on oral GC. Only the day after IV pulse there was a decrease in the expression levels of IFN-inducible genes. Red: over expression. Blue: under expression.

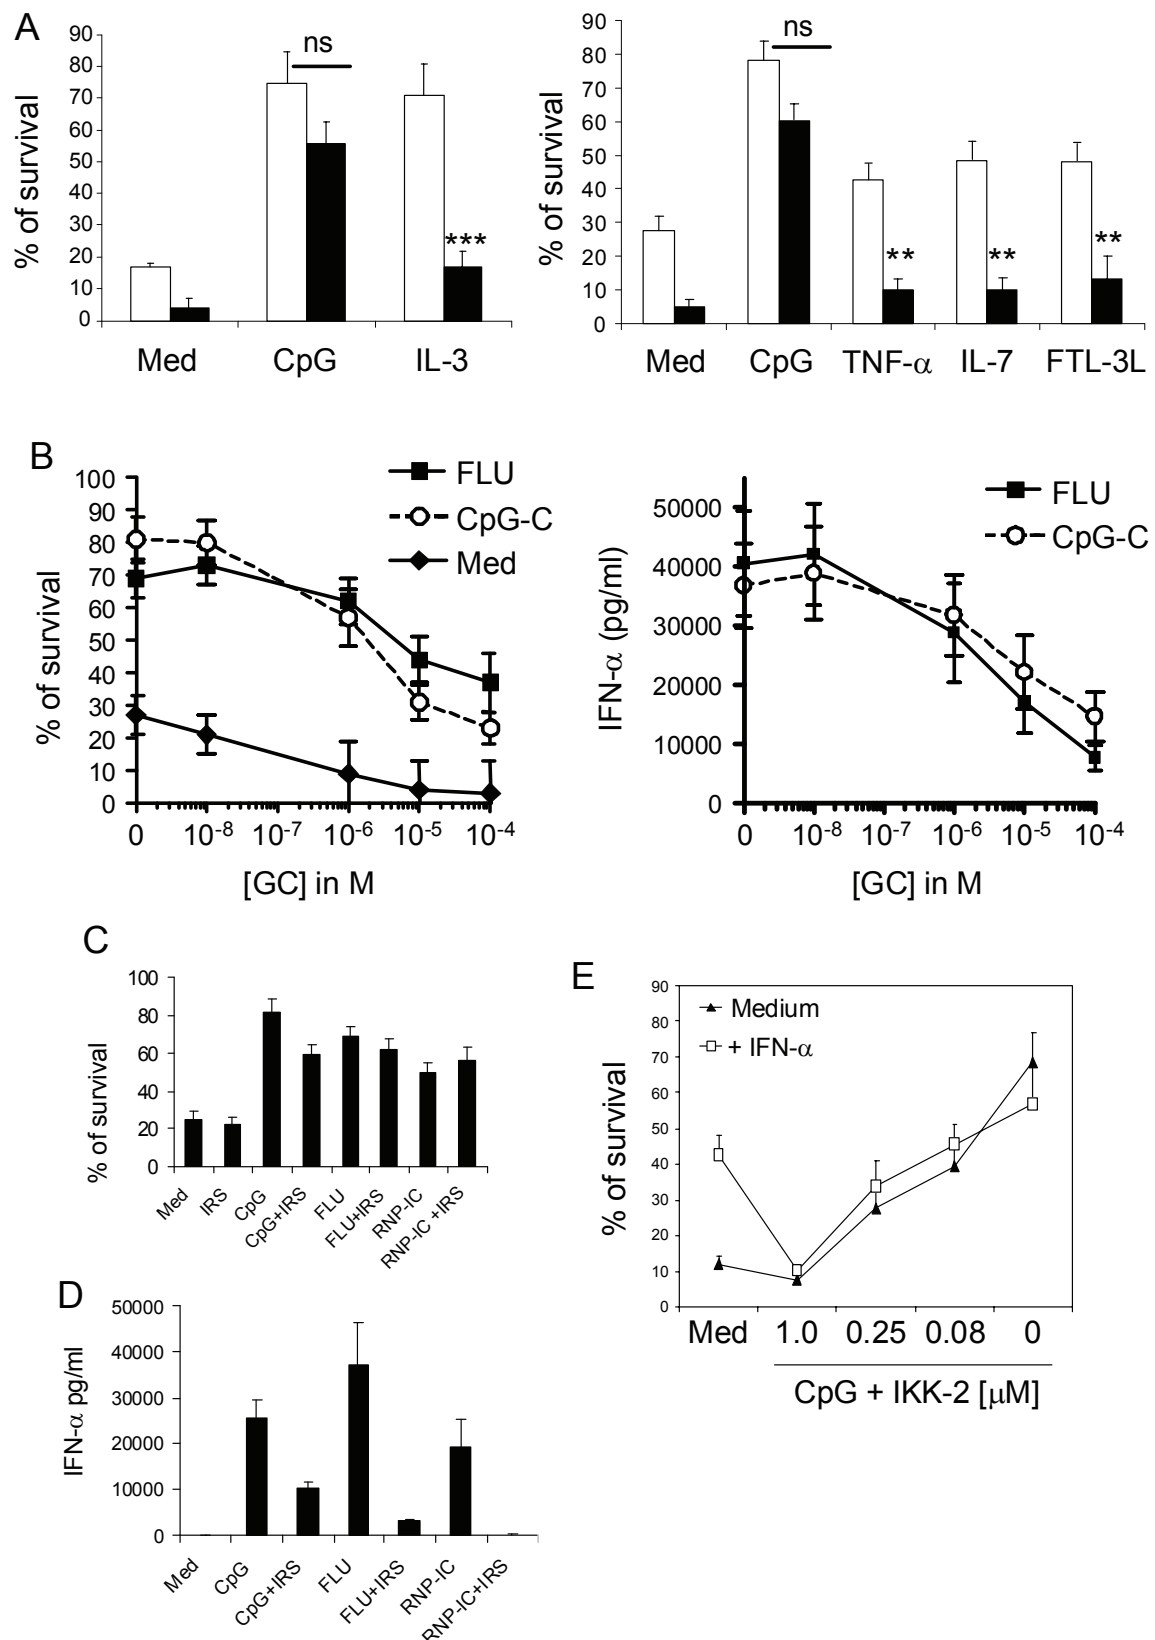

Supplementary Figure 2: TLR-induced signal protect PDC from GC-induced cell death.

IRS inhibits IFN- $\alpha$  production in TLR7/9 stimulated human PDC but does not induce cell death and exogenous IFN- $\alpha$  does not rescue PDC in absence of NF- $\kappa$ B activation.

(A) Purified human PDC were cultured with CpG-C ISS (0.5  $\mu$ M), IL-3 (5 ng/ml), TNF- $\alpha$  (20 ng/ml), IL-7 (10 ng/ml), FTL-3L (10 ng/ml) alone (white bar) or in the presence of GC (10<sup>-5</sup> M) (black bar). Viability was assessed after 24 hr. Average of 10 (left panel) and 13 (right panel) independent donors  $\pm$  standard error of the mean in five independent experiments is shown \*\*  $p \leq 0.01$ , \*\*\*  $p \leq 0.001$ . P values are between CpG + GC and cytokines + GC groups. (B) Purified human PDC were cultured with CpG-C ISS (0.5  $\mu$ M), Flu (2 MOI) either alone or in combination with various concentration of GC. Viability and production of IFN- $\alpha$  was assessed after 24 hr. Average of 10 independent donors is shown. (C, D) Purified PDC were cultured with CpG-C ISS (0.5  $\mu$ M), Flu (2 MOI) or RNP-IC (0.5 mg/ml) either alone or in the presence of IRS (1  $\mu$ M) (C) Viability was assessed after 24 hr. (D) IFN- $\alpha$  was measured by ELISA. Cumulative data of three independent experiments is shown.  $n=10$ . (E) Purified PDC were cultured with CpG-C ISS (0.5  $\mu$ M) with or without soluble IFN- $\alpha$  (20 ng/ml) either alone or in the presence of the NF-kB inhibitor IKK-2 at the indicated concentrations. Viability was assessed after 24 hr. Average  $\pm$  standard error of the mean of 10 independent donors is shown.

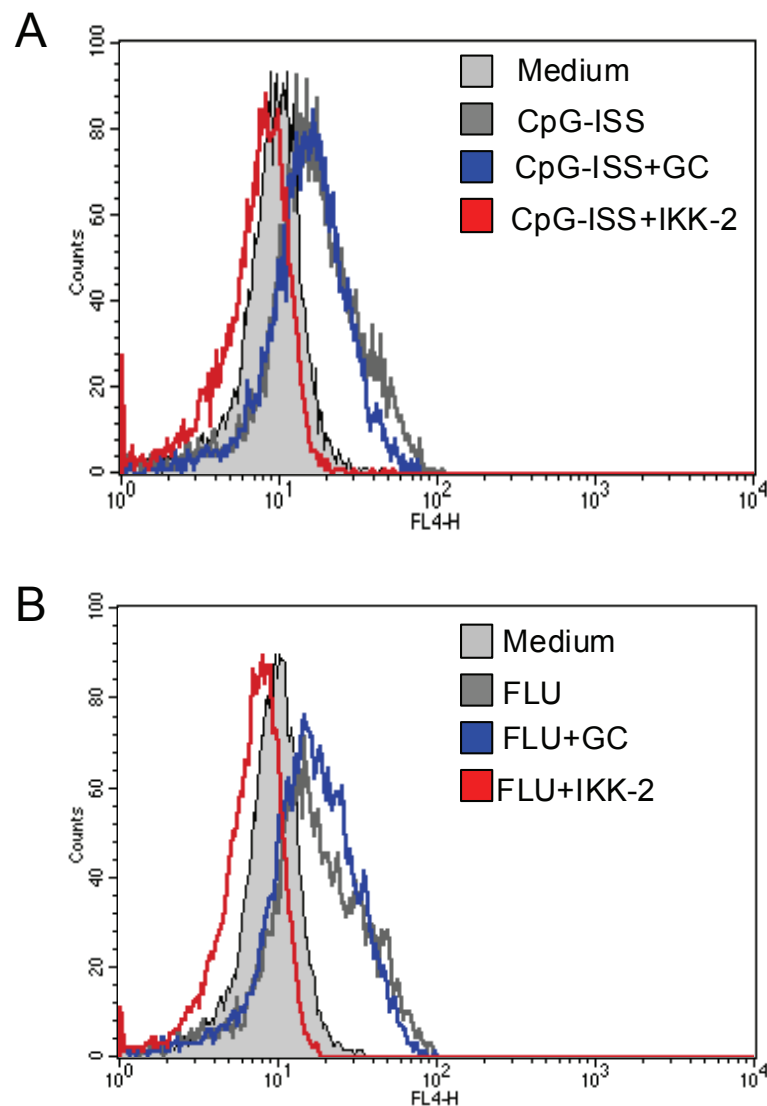

### Supplementary Figure 3: GC do not affect TLR-induced p65 phosphorylation in PDC

Negatively purified PDC were either left untreated or cultured with CpG-C ISS (0.5  $\mu$ M) (A), Flu (2 MOI) (B) either alone or in the presence of GC ( $10^{-5}$ M) or NF- $\kappa$ B inhibitor IKK-2 (0.5  $\mu$ M) for 90 min after which cells were fixed immediately permabilized with PermBuffer III for 30 minutes on ice and stained with either Alexa-647 anti-human NF- $\kappa$ B p65 (pS529) (BD bioscience) and then analyzed by flow cytometry. Representative histograms of at least three separate experiments.

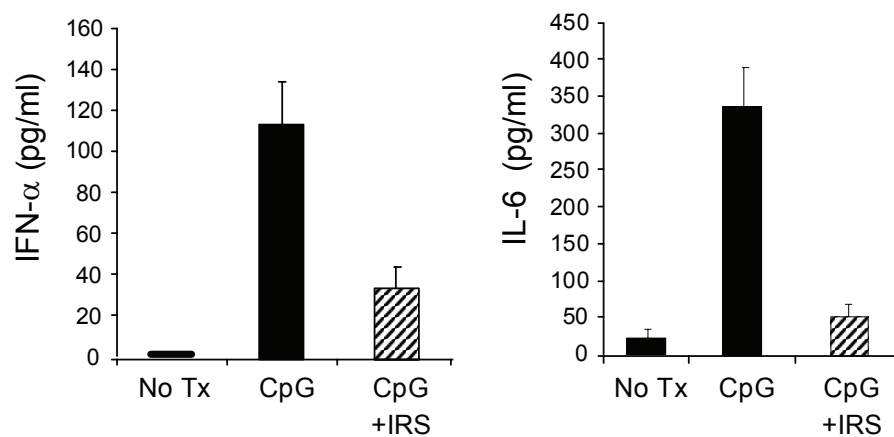

**Supplementary Figure 4: IRS significantly reduce CpG-C ISS-mediated induction of cytokines *in vivo***

129 mice were either left untreated or treated with CpG-C ISS (50 µg/mice) alone or with IRS (50 µg/mice) and serum was collected 6 hr later. IFN-α and IL-6 was evaluated by ELISA.  $n=6$  mice per group  $\pm$  standard error of the mean.

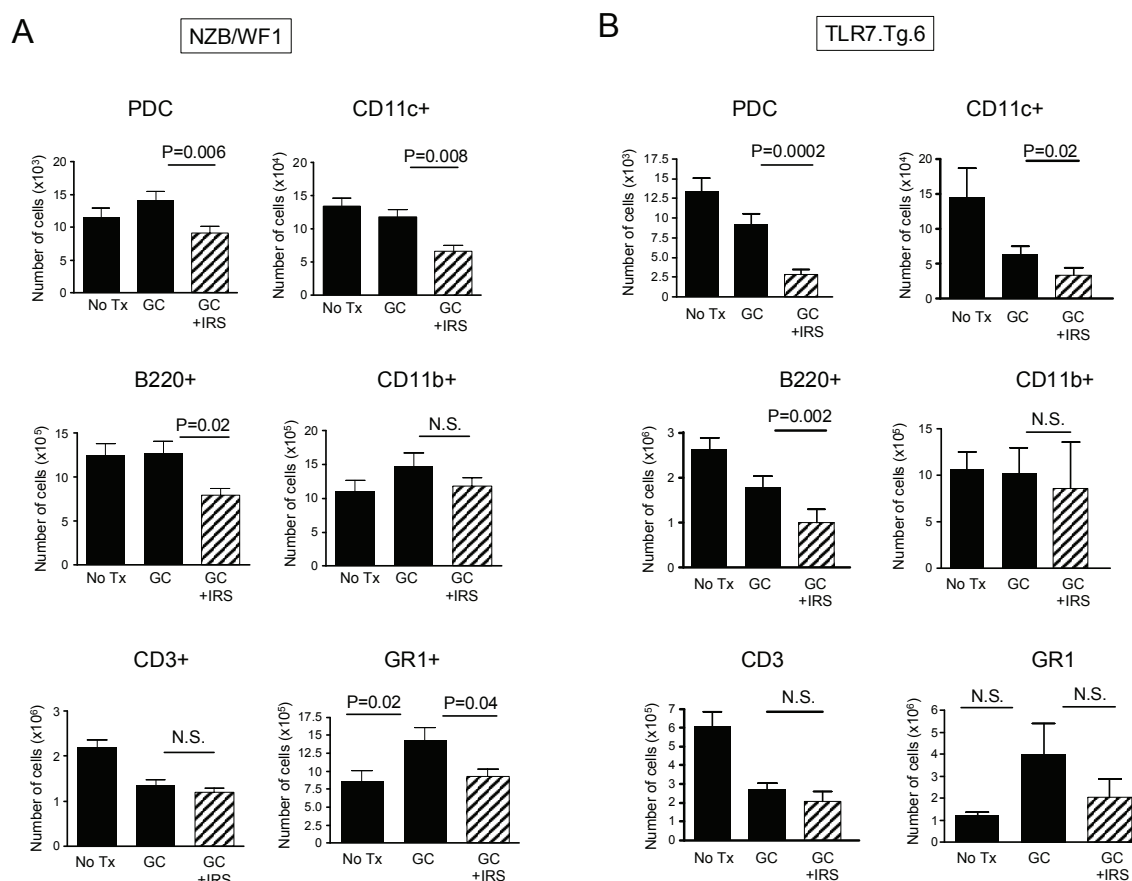

**Supplementary Figure 5: Increased resistance of PDC in lupus-prone mice is due to TLR7&9 stimulation**

(A) (NZBxNZW)<sub>F1</sub> and (B) TLR7.Tg.6 mice were left untreated or treated with GC (0.5 mg) alone or with IRS. IRS (100 µg/mice s.c.) was administered every 3 days for 10 days prior to the GC treatment. Viability of the different cell subsets was assessed 18 hr after the injection of GC. Data refers to cell number/ml in the blood. Cumulative data ± standard error of the mean of two independent experiments n= 8-12 mice/group.

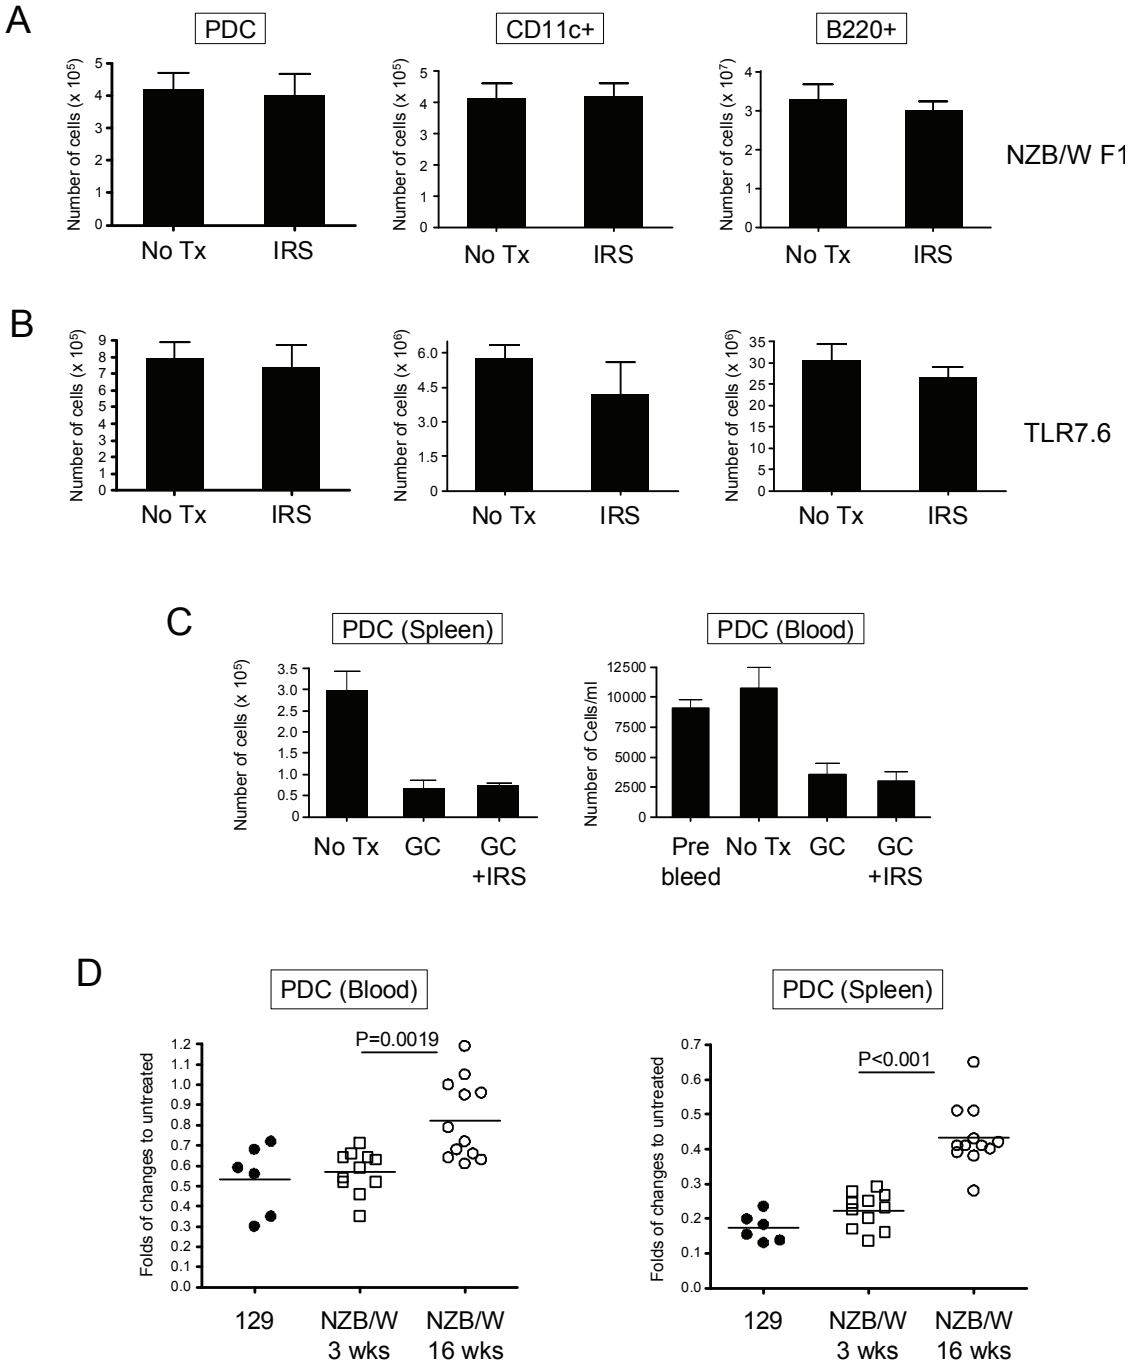

**Supplementary Figure 6: Treatment of lupus-prone mice with TLR inhibitors does not affect viability in vivo in absence of GC in lupus-prone mice and does not have any effect on GC-treated WT mice. Resistance of PDC to GC-induced cell death in lupus mice require cellular activation.**

(A) (NZBxNZW)F<sub>1</sub> or (B) TLR7.Tg.6 were either left untreated or treated every 3 days for 10 days with IRS (100 µg/mice s.c.) and the cell number was measured by flow cytometry in

the spleen 18 hr after last IRS administration. Data refers to the average  $\pm$  standard error of the mean of the total cell number in spleens  $n=6$  mice per group. Similar data were obtained in the blood stream (not shown). (C) 129 mice were left untreated or treated with GC 0.5 mg or GC plus IRS (100  $\mu$ g/mice s.c.) as described in figure 4. Viability of PDC was assessed 18 hr after the injection of GC  $n=6$  mice per group. (D) 129 or the (NZB $\times$ NZW) $F_1$  lupus-prone animals (3 weeks or 16 weeks old) were either left untreated or treated with GC as in figure 4. Here, the dose of GC was adjusted based on weight of mice and 3 weeks old mice received 0.25 mg while adult mice received 0.5 mg. PDC cell numbers in blood and spleens was assessed 18 hr later. Data are expressed as fold of change to untreated mice for each mouse.

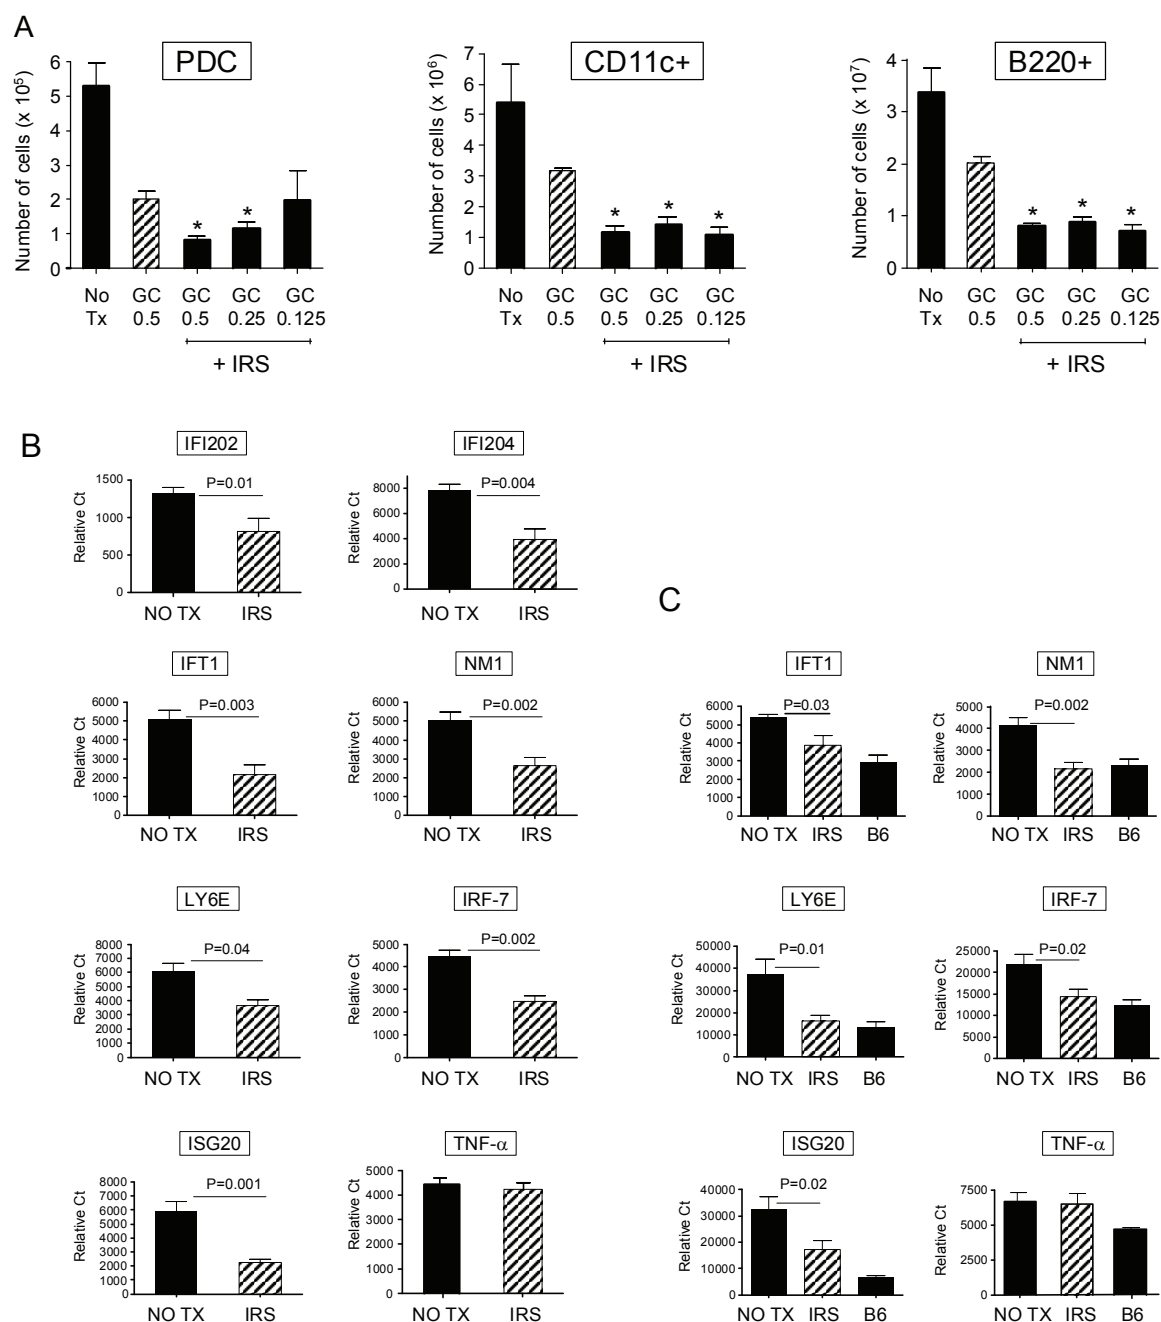

**Supplementary Figure 7: Treatment of lupus-prone mice with TLR inhibitors reduces levels of IFN-inducible genes**

(A) (NZBxNZW) $F_1$  mice were treated as described in figure 4 but when mice received IRS, we used different doses of GC (in mg per mouse here) (B) (NZBxNZW) $F_1$  and (C) TLR7.Tg.6 mice were left untreated or treated with IRS (100  $\mu$ g/mice s.c) every 3 days for 10 days and spleens were harvested 18 hr after the last IRS injection. RNA was prepared from the spleens of the animals and the levels of type I IFN-regulated genes were measured by quantitative analysis (Taqman).Averages  $\pm$  standard error of the mean for  $n=6-10$  mice per group.

## Supplementary Table 1

IFN Module Gene list

| Probe ID  | Gene Symbol | Entrez gene | Description                                                                                                   |
|-----------|-------------|-------------|---------------------------------------------------------------------------------------------------------------|
| 1010242   | BATF2       | 116071      | Basic leucine zipper transcription factor, ATF-like 2 (BATF2)                                                 |
| 5720438   | CMPK2       | 129607      | Cytidine monophosphate (UMP-CMP) kinase 2, mitochondrial (CMPK2), nuclear gene encoding mitochondrial protein |
| 7380544 * | CXCL10      | 3627        | Chemokine (C-X-C motif) ligand 10 (CXCL10)                                                                    |
| 1260681   | DDX60       | 55601       | DEAD (Asp-Glu-Ala-Asp) box polypeptide 60 (DDX60)                                                             |
| 6200273   | EPSTI1      | 94240       | Epithelial stromal interaction 1 (breast) (EPSTI1), transcript variant 2                                      |
| 1710259 * | HERC5       | 51191       | Hect domain and RLD 5 (HERC5)                                                                                 |
| 4280725   | HES4        | 57801       | Hairy and enhancer of split 4 (Drosophila) (HES4)                                                             |
| 5870221 * | IFI44       | 10561       | Interferon-induced protein 44 (IFI44)                                                                         |
| 7200255   | IFI44L      | 10964       | Interferon-induced protein 44-like (IFI44L)                                                                   |
| 1780632   | IFIT1       | 3434        | Interferon-induced protein with tetratricopeptide repeats 1 (IFIT1), transcript variant 2                     |
| 6220673 * | IFIT1       | 3434        | Interferon-induced protein with tetratricopeptide repeats 1 (IFIT1), transcript variant 2                     |
| 430021    | IFIT3       | 3437        | Interferon-induced protein with tetratricopeptide repeats 3 (IFIT3)                                           |
| 2690452 * | IFIT3       | 3437        | Interferon-induced protein with tetratricopeptide repeats 3 (IFIT3)                                           |
| 3830041   | IFIT3       | 3437        | Interferon-induced protein with tetratricopeptide repeats 3 (IFIT3)                                           |
| 4210291   | IFITM3      | 10410       | Interferon induced transmembrane protein 3 (1-8U) (IFITM3)                                                    |
| 1070528 * | ISG15       | 9636        | ISG15 ubiquitin-like modifier (ISG15)                                                                         |
| 1500204   | LAMP3       | 27074       | Lysosomal-associated membrane protein 3 (LAMP3)                                                               |
| 5810709   | LOC26010    | 26010       | Viral DNA polymerase-transactivated protein 6 (LOC26010), transcript variant 2                                |
| 2940022 * | LY6E        | 4061        | Lymphocyte antigen 6 complex, locus E (LY6E)                                                                  |
| 2630110   | MX1         | 4599        | Myxovirus (influenza virus) resistance 1, interferon-inducible protein p78 (mouse) (MX1)                      |

|           |          |        |                                                                                                                         |
|-----------|----------|--------|-------------------------------------------------------------------------------------------------------------------------|
| 3940731   | OAS1     | 4938   | 2',5'-oligoadenylate synthetase 1, 40/46kda (OAS1), transcript variant 3                                                |
| 4040632   | OAS1     | 4938   | 2',5'-oligoadenylate synthetase 1, 40/46kda (OAS1), transcript variant 2                                                |
| 6560494 * | OAS1     | 4938   | 2',5'-oligoadenylate synthetase 1, 40/46kda (OAS1), transcript variant 1                                                |
| 1240754   | OAS2     | 4939   | 2'-5'-oligoadenylate synthetase 2, 69/71kda (OAS2), transcript variant 1                                                |
| 7330373 * | OAS2     | 4939   | 2'-5'-oligoadenylate synthetase 2, 69/71kda (OAS2), transcript variant 2                                                |
| 4220435 * | OAS3     | 4940   | 2'-5'-oligoadenylate synthetase 3, 100kda (OAS3)                                                                        |
| 6370035 * | OASL     | 8638   | 2'-5'-oligoadenylate synthetase-like (OASL), transcript variant 2                                                       |
| 7150196   | OASL     | 8638   | 2'-5'-oligoadenylate synthetase-like (OASL), transcript variant 1                                                       |
| 3710184 * | OTOF     | 9381   | Otoferlin (OTOF), transcript variant 4                                                                                  |
| 6620711   | RSAD2    | 91543  | Radical S-adenosyl methionine domain containing 2 (RSAD2)                                                               |
| 770364    | RTP4     | 64108  | Receptor (chemosensory) transporter protein 4 (RTP4)                                                                    |
| 4390575   | SERPING1 | 710    | Serpin peptidase inhibitor, clade G (C1 inhibitor), member 1, (angioedema, hereditary) (SERPING1), transcript variant 2 |
| 380386    | TRIM6    | 117854 | Tripartite motif-containing 6 (TRIM6), transcript variant 2                                                             |
| 1740341   | XAF1     | 54739  | XIAP associated factor 1 (XAF1), transcript variant 2                                                                   |
| 940673    |          |        | Erythroid Precursor Cells (LCB:cl library) cdna clone cl02h05 5                                                         |
| 6900603   |          |        | AGENCOURT_7914287 NIH_MGC_71 cdna clone<br>IMAGE:6156595 5, mrna sequence                                               |

\* Probes in Nanostring Codeset

## Supplementary Table 2

### Patient information

| Subject | Ethnic   | Gender | Age |
|---------|----------|--------|-----|
| SLE-20  | AA       | Female | 16  |
| SLE-29  | Hispanic | Male   | 16  |
| SLE-31  | Hispanic | Female | 12  |
| SLE-33  | Asian    | Female | 11  |
| SLE-34  | Hispanic | Female | 16  |
| SLE-40  | AA       | Female | 15  |
| SLE-55  | AA       | Female | 16  |
| SLE-60  | Hispanic | Female | 15  |
| SLE-64  | White    | Female | 16  |
| SLE-79  | Hispanic | Female | 14  |
| SLE-80  | AA       | Female | 16  |
| SLE-83  | AA       | Female | 15  |
| SLE-87  | White    | Female | 17  |
| SLE-91  | Asian    | Female | 14  |
| SLE-95  | AA       | Female | 17  |
| SLE-110 | AA       | Female | 15  |
| SLE-121 | Hispanic | Female | 15  |
| SLE-123 | Hispanic | Male   | 13  |
| SLE-125 | Hispanic | Female | 15  |
| SLE-128 | AA       | Female | 16  |
| SLE-141 | Hispanic | Male   | 14  |
| SLE-142 | White    | Female | 17  |
| SLE-143 | Hispanic | Female | 15  |
| SLE-144 | White    | Female | 14  |
| SLE-154 | Hispanic | Male   | 13  |
| SLE-157 | AA       | Female | 17  |
| SLE-158 | Hispanic | Female | 17  |
| SLE-163 | White    | Female | 11  |
| SLE-168 | Hispanic | Female | 17  |
| SLE-169 | Hispanic | Female | 14  |
| SLE-171 | Hispanic | Female | 13  |
| SLE-172 | Hispanic | Female | 11  |
| SLE-175 | White    | Female | 12  |
| SLE-179 | Hispanic | Female | 13  |

|         |          |        |    |
|---------|----------|--------|----|
| SLE-181 | Hispanic | Female | 12 |
| SLE-182 | Hispanic | Male   | 15 |
| SLE-183 | Hispanic | Female | 11 |
| SLE-184 | AA       | Female | 7  |
| SLE-185 | Asian    | Female | 13 |
| SLE-186 | Asian    | Female | 18 |
| SLE-187 | Hispanic | Female | 13 |
| SLE-188 | Hispanic | Female | 12 |
| SLE-189 | AA       | Female | 14 |
| SLE-191 | AA       | Female | 16 |
| SLE-192 | Hispanic | Male   | 16 |
| SLE-196 | AA       | Female | 14 |
| SLE-198 | AA       | Male   | 18 |
| SLE-208 | AA       | Female | 14 |
| SLE-212 | AA       | Female | 14 |
| SLE-213 | White    | Female | 12 |
| SLE-214 | Hispanic | Female | 16 |
| SLE-215 | Other    | Female | 12 |
| SLE-216 | White    | Male   | 12 |
| SLE-225 | Hispanic | Female | 16 |
| SLE-226 | Asian    | Male   | 15 |
| SLE-229 | AA       | Female | 17 |
| SLE-231 | AA       | Female | 17 |
| SLE-233 | White    | Female | 11 |
| SLE-237 | Hispanic | Female | 12 |
| SLE-238 | White    | Female | 17 |
| SLE-240 | Hispanic | Female | 15 |
| SLE-241 | AA       | Female | 13 |
| SLE-242 | Hispanic | Female | 10 |
| SLE-244 | Hispanic | Female | 9  |
| SLE-249 | AA       | Male   | 9  |
| SLE-252 | AA       | Female | 14 |
| SLE-260 | AA       | Female | 12 |
| SLE-270 | Asian    | Female | 14 |
| SLE-276 | White    | Male   | 12 |
| SLE-277 | Hispanic | Female | 17 |
| SLE-282 | AA       | Female | 17 |
